# Supplementary material for: Overexpression of NT-3 in the hippocampus suppresses the early phase of the adult neurogenic process
Source: Front Neurosci. 2023 Jul 27;17:1178555. doi: 10.3389/fnins.2023.1178555 (PMC10413268; doi:10.3389/fnins.2023.1178555)
Supplement: Supplementary file 2 [file Table_1.XLSX]

## Sheet: Figure
Table S1 Statistical Analysis
Figure 1		Shapiro-Wilk test (AAV-EGFP)	Shapiro-Wilk test (AAV-NT-3)	F value	Test	T value	P value
Figure 1D	Ntf3	P=0.6336	P=0.8047	F(7,7)=1010, P<0.0001	Unpaired t test with Welch's correction	t(7.0)=5.239	P=0.0012
	Trkc	P=0.0323	P=0.7954		Mann whitney test	U=22	P=0.3282
Figure 2
Figure 2B	Calbindin intensity in GCL	P=0.3564	P=0.3597	F(4,3)=1.162, P=0.9392	Unpaired t test	t(7)=3.386	P=0.0117
	Calbindin intensity in ML	P=0.7389	P=0.3595	F(4,3)=1.204, P=0.9152	Unpaired t test	t(7)=3.302	P=0.0131
Figure 2C	Calb1 mRNA	P=0.1245	P=0.7184	F(7,7)=1.599, P=0.5507	Unpaired t test	t(14)=4.147	P=0.0010
Figure 2E	FosB IHC	P=0.1087	P=0.7389	F(10,9)=1.029, P=0.9747	Unpaired t test	t(19)=4.037	P=0.0007
Figure 3	Fosb	P=0.7940	P=0.9338	F(7,7)=2.488, P=0.2521	Unpaired t test	t(14)=4.565	P=0.0163
	Fos	P=0.1567	P=0.1921	F(7,7)=2.945, P=0.1775	Unpaired t test	t(14)=2.728	P=0.0004
	Arc	P=0.8399	P=0.0814	F(7,7)=4.514, P=0.0649	Unpaired t test	t(14)=5.965	P<0.0001
	Egr1	P=0.4076	P=0.6426	F(7,7)=6.330, P=0.0264	Unpaired t test with Welch's correction	t(9.2)=5.988	P=0.0002
	Bdnf	P=0.5544	P=0.7483	F(7,7)=3.477, P=0.1223	Unpaired t test	t(14)=2.322	P=0.0358
	Npas4	P=0.6714	P=0.3326	F(7,7)=1.104, P=0.5511	Unpaired t test	t(14)=1.587	P=0.1349
Figure 4
Figure 4C	Dorsal DG EdU(+) cells	P=0.8557	P=0.9902	F(4,3)=1.450, P=0.7073	Unpaired t test	t(7)=3.628	P=0.0084
	Ventral DG EdU(+) cells	P=0.1895	P=0.1867	F(4,3)=1.827, P=0.6480	Unpaired t test	t(7)=6.159	P=0.0005
Figure 4E	Short dendrites DCX(+) cells	P=0.4362	P=0.7936	F(4,4)=1.217, P=0.8534	Unpaired t test	t(8)=6.690	P=0.0002
	Long dendrites DCX(+) cells	P=0.8208	P=0.4862	F(4,4)=1.174, P=0.8804	Unpaired t test	t(8)=2.465	P=0.0390
Figure 4G	BrdU(+) cells	P=0.6330	P=0.4066	F(4,3)=1.404, P=0.8128	Unpaired t test	t(7)=0.8599	P=0.4138
	Ratio of BrdU(+) NeuN(+) cells	P=0.7538	P=0.6313	F(4,4)=9.469, P=0.0513	Unpaired t test	t(8)=1.619	P=0.1440
Figure 5
Figure 5C	pERK	P=0.0831	P=0.2219	F(5,4)=2.038, P=0.5099	Unpaired t test	t(9)=2.027	P=0.0733
Figure 5E	pPLCg1	P=0.4479	P=0.7386	F(5,4)=1.064, P=0.9216	Unpaired t test	t(9)=0.9626	P=0.3609
Figure 6
Figure 6A	Vegfa	P=0.1999	P=0.2836	F(7,7)=1.725, P=0.4890	Unpaired t test	t(14)=1.308	P=0.2118
	Vegfd	P=0.0563	P=0.3926	F(7,7)=28.37, P=0.0003	Unpaired t test with Welch's correction	t(7.5)=2.798	P=0.0248
Figure 6B	Wnt2	P=0.1471	P=0.3915	F(7,7)=3.019, P=0.1681	Unpaired t test	t(14)=0.1073	P=0.9160
	Fzd6	P=0.7652	P=0.6773	F(7,7)=1.992, P=0.3834	Unpaired t test	t(14)=0.2060	P=0.8397
	Lgr6	P=0.7236	P=0.0010		Mann whitney test	U=1	P=0.0003
Figure 6C	Bmp2	P=0.6193	P=0.3319	F(7,7)=11.42, P=0.0047	Unpaired t test with Welch's correction	t(8.2)=1.670	P=0.1325
	Bmp4	P=0.0003	P=0.1472		Mann whitney test	U=29	P=0.7984
	Bmp7	P=0.5186	P=0.5105	F(7,7)=1.184, P=0.8292	Unpaired t test	t(14)=5.963	P<0.0001
Figure 6D	Drd1	P=0.1821	P=0.2823	F(7,7)=6.125, P=0.0289	Unpaired t test with Welch's correction	t(9.2)=3.960	P=0.0031
Figure S1
Figure S1 C	Iba1 IHC	P=0.4980	P=0.2531	F(4,4)=10.66, P=0.0416	Unpaired t test with Welch's correction	t(4.7)=1.180	P=0.2939
Figure S1 D	Iba1 mRNA	P=0.8194	P=0.8547	F(7,7)=1.782, P=0.0417	Unpaired t test	t(14)=0.1450	P=0.8868
	TrkC intensity in ML	P=0.9144	P=0.4230	F(4, 5)=1.428,P=0.6945	Unpaired t test	t(9)=10.93	P<0.0001
